# Supplementary material
Source: publisher site journal article supplement (https://www.dovepress.com/article/397020)
Supplement: Supplementary file 1 [file get_supplementary_file.php]

Supplementary Appendix

Table of Contents

[**Table S1.** LOINCs and Implausible values Cut-Off for Serum Creatinine Results. 2](#_Toc124323792)

[**Table S2.** Selected Variables and Coefficients for The Final eGFR Prediction Score. 3](#_Toc124323793)

[**Table S3.** Hosmer-Lemeshow Goodness of Fit Tables, eGFR Cut-Off <60. 6](#_Toc124323794)

[**Table S4.** Hosmer-Lemeshow Goodness of Fit Tables, eGFR Cut-Off <45. 7](#_Toc124323795)

[**Table S5.** Selected Variables and Coefficients for the Final Model Based on Logistic Regression Predicting eGFR<30. 8](#_Toc124323796)

[**Table S6.** Hosmer-Lemeshow Goodness of Fit Tables, Using the Primary Model to Predict eGFR Cut-off <30. 10](#_Toc124323797)

[**Table S7.** Hosmer-Lemeshow Goodness of Fit Tables, Using the Secondary Model to Predict eGFR Cut-Off <30. 11](#_Toc124323798)

This appendix has been provided by the authors to give readers additional information.

# **Table S1.** LOINCs and Implausible values Cut-Off for Serum Creatinine Results.

| Lab item, units | LOINC | Implausible value cut-off |
| --- | --- | --- |
| Creatinine (mg/dl) | 2160-0  44784-7  35203-9  40248-7  72271-0  21232-4  38483-4 | <=0, >20 |
| Creatinine (umol/L) | 77140-2  35203-9  14682-9  40264-4  59826-8  77140-2 | <=0, >1768.4 |

LOINC: Logical Observation Identifiers Names and Codes.

# **Table S2.** Selected Variables and Coefficients for The Final eGFR Prediction Score.

| **Parameter** | **Coefficient (SE)** | **P value** |
| --- | --- | --- |
| Intercept | 83.098 (0.182) | <0.001 |
| Age category: ≥90 | -18.151 (0.256) | <0.001 |
| Age category: 85-90 | -14.444 (0.201) | <0.001 |
| Age category: 80-84 | -11.415 (0.171) | <0.001 |
| Age category: 75-79 | -7.567 (0.153) | <0.001 |
| Age category: 70-74 | -4.024 (0.126) | <0.001 |
| Female | -2.060 (0.107) | <0.001 |
| Black | -4.425 (0.276) | <0.001 |
| **Comorbidities** | | |
| CHA2DS2-VASc category: ≥6 | -2.266 (0.259) | <0.001 |
| CHA2DS2-VASc category: 4-5 | -1.194 (0.150) | <0.001 |
| Combined score category: ≥4 | -0.877 (0.201) | <0.001 |
| Combined score category: 1-3 | -1.076 (0.127) | <0.001 |
| Frailty category: ≥0.34 | 3.164 (0.437) | <0.001 |
| Frailty category: 0.25-0.34 | 1.115 (0.255) | <0.001 |
| Frailty category: 0.15-0.24 | -0.173 (0.132) | 0.19 |
| Abdominal ultrasound | -0.785 (0.172) | <0.001 |
| Abnormal liver function | 1.313 (0.278) | <0.001 |
| Acute kidney injury | -11.002 (0.220) | <0.001 |
| Acute liver failure | -1.533 (1.157) | 0.18 |
| Atrial fibrillation | 1.120 (0.170) | <0.001 |
| Alcohol liver disease | -2.253 (0.742) | 0.002 |
| Alcohol use disorder | 2.138 (0.315) | <0.001 |
| Anemia | -0.731 (0.131) | <0.001 |
| Autoimmune liver disease | 0.618 (0.800) | 0.44 |
| Budd-Chiari syndrome | -1.389 (2.816) | 0.62 |
| Cancer | 0.434 (0.115) | <0.001 |
| Chronic hepatitis unspecified | -0.609 (1.190) | 0.61 |
| Chronic unspecified liver failure | -1.130 (1.074) | 0.29 |
| Chronic viral hepatitis | 0.199 (0.498) | 0.69 |
| Cirrhosis complications | 1.064 (0.678) | 0.12 |
| Chronic kidney disease | -18.719 (0.167) | <0.001 |
| Combination varices | 2.245 (0.988) | 0.02 |
| Chronic obstructive pulmonary disease (COPD) | 0.241 (0.151) | 0.11 |
| Coronary revascularization | 2.445 (0.520) | <0.001 |
| Dementia | -0.763 (0.205) | <0.001 |
| Dorsopathies | 0.659 (0.125) | <0.001 |
| Drug abuse | 0.218 (0.395) | 0.58 |
| Drug use disorder | -0.830 (0.259) | <0.001 |
| Deep vein thrombosis | 0.863 (0.277) | <0.001 |
| Electrocardiogram | 0.091 (0.114) | 0.43 |
| Excessive frequent menstruation | 0.979 (2.340) | 0.68 |
| Falls | 1.221 (0.166) | <0.001 |
| Flu vaccine | 0.710 (0.104) | <0.001 |
| Fluid electrolyte imbalance | 1.650 (0.155) | <0.001 |
| Foot ulcer | -1.093 (0.320) | <0.001 |
| Gangrene | 1.614 (0.916) | 0.08 |
| Gastroesophageal reflux disease (GERD) | 0.419 (0.260) | 0.12 |
| Gestational diabetes | 7.002 (9.054) | 0.44 |
| Glaucoma and cataracts | 0.509 (0.101) | <0.001 |
| Hepatocellular carcinoma | 1.104 (0.969) | 0.25 |
| Hemochromatosis | 1.173 (0.726) | 0.11 |
| Hepatic fibrosis sclerosis fibrosis with sclerosis | 0.509 (1.539) | 0.74 |
| Hyperkalemia | -4.444 (0.278) | <0.001 |
| Hyperlipidemia | 0.369 (0.110) | <0.001 |
| Hypertension | -1.316 (0.122) | <0.001 |
| Hyperthyroid | -0.275 (0.418) | 0.51 |
| Hypoglycemia | 1.078 (0.160) | <0.001 |
| Hypotension | 0.648 (0.187) | <0.001 |
| Intracranial bleed | 2.566 (0.343) | <0.001 |
| Ischemic heart disease | -0.209 (0.137) | 0.13 |
| Ischemic stroke | 0.456 (0.188) | 0.01 |
| Joint back pain | 0.048 (0.130) | 0.71 |
| Kidney cancer | -6.919 (0.479) | <0.001 |
| Kidney stones | -1.384 (0.256) | <0.001 |
| Laser photocoagulation and vitrectomy | -4.674 (1.117) | <0.001 |
| Late effects of cerebrovascular disease | 1.685 (0.252) | <0.001 |
| Liver disease | 1.391 (0.462) | <0.001 |
| Liver transplant | -14.656 (1.342) | <0.001 |
| Lower extremity amputations | 1.832 (0.728) | 0.01 |
| Lower gastrointestinal bleed | 0.544 (0.217) | 0.01 |
| Nonalcoholic fatty liver disease | -0.656 (0.499) | 0.19 |
| Non-alcoholic steatohepatitis | 0.831 (1.512) | 0.58 |
| Obesity | 0.262 (0.164) | 0.11 |
| Paracentesis | 2.648 (0.728) | <0.001 |
| Pulmonary embolism | 1.549 (0.368) | <0.001 |
| Peptic ulcer disease | 0.355 (0.256) | 0.17 |
| Portal hypertension | 1.237 (0.994) | 0.21 |
| Portal vein thrombosis | -16.115 (11.204) | 0.15 |
| Primary liver cancer | 1.546 (0.946) | 0.10 |
| Peripheral vascular disease | -0.522 (0.156) | <0.001 |
| Surgical aortic valve replacement | 3.591 (0.737) | <0.001 |
| Second unspecified cirrhosis | -3.167 (1.448) | 0.03 |
| Shortness of breath | 0.419 (0.133) | <0.001 |
| Sleep apnea | 0.828 (0.209) | <0.001 |
| Smoking | 2.276 (0.155) | <0.001 |
| Somatic consequences alcohol use disorder | 0.921 (0.643) | 0.15 |
| Transcatheter aortic valve replacement | 3.309 (1.431) | 0.02 |
| Type 1 diabetes mellitus | -1.440 (0.278) | <0.001 |
| Type 2 diabetes mellitus | -1.082 (0.1667) | <0.001 |
| Upper endoscopy | 0.623 (0.225) | 0.01 |
| Upper gastrointestinal bleed | 0.957 (0.993) | 0.33 |
| Wilson's disease | -9.976 (4.736) | 0.04 |
| **Medication Use** | | |
| Angiotensin-converting enzyme (ACE) inhibitors | -1.700 (0.109) | <0.001 |
| Alpha 1 antitrypsin deficiency | -1.636 (2.581) | 0.53 |
| Antiarrhythmics | -3.189 (0.322) | <0.001 |
| Anti-obesity medications | 0.953 (1.157) | 0.41 |
| Antibiotics | 0.350 (0.099) | <0.001 |
| Antiplatelet agents | -1.060 (0.185) | <0.001 |
| Apixaban | 2.121 (0.547) | <0.001 |
| Angiotensin II receptor blockers (ARBs) | -2.830 (0.210) | <0.001 |
| Betablockers | -1.912 (0.108) | <0.001 |
| Calcium channel blockers | -1.211 (0.164) | <0.001 |
| Ciprofloxacin | 9.34 (2.914) | <0.001 |
| COX-2 inhibitors | 0.632 (0.386) | 0.10 |
| Dabigatran | 2.337 (0.684) | <0.001 |
| H2 receptor antagonists | -0.622 (0.219) | 0.05 |
| Insulin | -1.810 (0.308) | <0.001 |
| Lactulose | 0.292 (0.413) | 0.48 |
| Loop diuretics | -3.510 (0.154) | <0.001 |
| Non-insulin antidiabetic medications | 1.304 (0.183) | <0.001 |
| NSAIDs | 0.139 (0.152) | 0.36 |
| Opioids | 1.553 (0.140) | <0.001 |
| Proton pump inhibitors | -0.569 (0.120) | <0.001 |
| Rivaroxaban | 2.476 (0.494) | <0.001 |
| Spironolactone | -1.964 (0.323) | <0.001 |
| Statin | -0.865 (0.110) | <0.001 |
| Warfarin | -0.459 (0.187) | 0.01 |
| **Healthcare Utilization** | | |
| Number of inpatient visits: ≥1 | 0.996 (0.144) | <0.001 |
| Number of emergency department visits: ≥1 | 0.407 (0.125) | <0.001 |
| Number of liver function tests: ≥1 | -0.111 (0.101) | 0.27 |
| Number of office visits: ≥10 | -0.754 (0.165) | <0.001 |
| Number of office visits: 6 | -0.531 (0.147) | <0.001 |
| Number of office visits: 3 | -0.188 (0.133) | 0.16 |
| Skilled nursing facility days: ≥1 | 2.729 (0.184) | <0.001 |

eGFR: estimated glomerular filtration rate.

# **Table S3.** Hosmer-Lemeshow Goodness of Fit Tables, eGFR Cut-Off <60.

| Deciles by Predicted eGFR | eGFR Score <60 in Training Set | | | eGFR Score <60 in Validation Set | | |
| --- | --- | --- | --- | --- | --- | --- |
| N. of Patients | Observed N. Events | Expected N. Events | N. of Patients | Observed N. Events | Expected N. Events |
| 1 | 11,748 | 681 | 786.64 | 5,675 | 296 | 303.86 |
| 2 | 11,749 | 948 | 1,090.10 | 5,675 | 360 | 434.79 |
| 3 | 11,748 | 1,120 | 1,325.49 | 5,675 | 495 | 529.99 |
| 4 | 11,749 | 1,500 | 1,616.09 | 5,674 | 597 | 649.89 |
| 5 | 11,748 | 2,023 | 1,996.05 | 5,674 | 829 | 802.80 |
| 6 | 11,749 | 2,729 | 2,546.72 | 5,674 | 1,041 | 1,020.72 |
| 7 | 11,748 | 3,550 | 3,328.32 | 5,674 | 1,381 | 1,341.99 |
| 8 | 11,748 | 4,716 | 4,456.21 | 5,674 | 1,932 | 1,867.07 |
| 9 | 11,749 | 6,563 | 6,378.95 | 5,674 | 3,022 | 2,889.30 |
| 10 | 11,740 | 9,571 | 9,876.43 | 5,675 | 4,602 | 4,714.59 |

eGFR: estimated glomerular filtration rate.

# **Table S4.** Hosmer-Lemeshow Goodness of Fit Tables, eGFR Cut-Off <45.

| Deciles by Predicted eGFR | eGFR Score <45 in Training Set | | | eGFR Score <45 in Validation Set | | |
| --- | --- | --- | --- | --- | --- | --- |
| N. of Patients | Observed N. Events | Expected N. Events | N. of Patients | Observed N. Events | Expected N. Events |
| 1 | 11,748 | 79 | 144.15 | 5,673 | 36 | 54.16 |
| 2 | 11,750 | 111 | 208.07 | 5,674 | 44 | 80.46 |
| 3 | 11,747 | 156 | 261.01 | 5,675 | 72 | 100.72 |
| 4 | 11,749 | 228 | 330.06 | 5,674 | 100 | 127.43 |
| 5 | 11,748 | 353 | 426.70 | 5,674 | 134 | 163.48 |
| 6 | 11,749 | 565 | 580.41 | 5,674 | 185 | 218.91 |
| 7 | 11,748 | 866 | 829.62 | 5,674 | 282 | 310.11 |
| 8 | 11,749 | 1,496 | 1,269.33 | 5,674 | 531 | 488.72 |
| 9 | 11,748 | 2,812 | 2,355.57 | 5,674 | 1,254 | 1,000.91 |
| 10 | 11,740 | 6,503 | 6,764.59 | 5,678 | 3,023 | 3,116.09 |

eGFR: estimated glomerular filtration rate.

# **Table S5.** Selected Variables and Coefficients for the Final Model Based on Logistic Regression Predicting eGFR<30.

| **Predictors** | **Coefficients (SE)** | **P value** |
| --- | --- | --- |
| Intercept | -3.909 (0.156) | <0.001 |
| Age category: ≥90 | 0.514 (0.055) | <0.001 |
| Age category: 85-90 | 0.260 (0.046) | <0.001 |
| Age category: 80-84 | 0.111 (0.043) | 0.01 |
| Age category: 75-79 | -0.121 (0.045) | 0.01 |
| Age category: 70-74 | -0.255 (0.050) | <0.001 |
| Black | 0.183 (0.048) | <0.001 |
| Female | 0.177 (0.023) | <0.001 |
| **Comorbidities** | | |
| CHA2DS2-VASc category: ≥6 | 0.104 (0.049) | 0.03 |
| CHA2DS2-VASc category: 4-5 | 0.130 (0.030) | <0.001 |
| Combined score category: ≥4 | 0.167 (0.051) | <0.001 |
| Combined score category: 1-3 | 0.235 (0.037) | <0.001 |
| Frailty category: ≥0.34 | 0.101 (0.075) | 0.18 |
| Frailty category: 0.25-0.34 | 0.043 (0.044) | 0.33 |
| Frailty category: 0.15-0.24 | 0.094 (0.040) | 0.02 |
| Abdominal ultrasound | 0.210 (0.026) | <0.001 |
| Abnormal liver function | -0.207 (0.040) | <0.001 |
| Acute kidney injury | 0.657 (0.028) | <0.001 |
| Atrial fibrillation | -0.144 (0.029) | <0.001 |
| Anemia | 0.164 (0.023) | <0.001 |
| Cancer | -0.080 (0.024) | <0.001 |
| Chronic kidney disease | 1.249 (0.028) | <0.001 |
| Depression | -0.093 (0.027) | <0.001 |
| Dorsopathies | -0.091 (0.023) | <0.001 |
| Deep vein thrombosis | -0.167 (0.049) | <0.001 |
| Electrocardiogram | -0.069 (0.029) | 0.02 |
| Falls | -0.108 (0.030) | <0.001 |
| Flu vaccine | -0.118 (0.024) | <0.001 |
| Fluid electrolyte imbalance | 0.053 (0.028) | 0.06 |
| Gastroesophageal reflux disease (GERD) | -0.090 (0.048) | 0.06 |
| Glaucoma and cataracts | -0.051 (0.022) | 0.02 |
| Hyperkalemia | 0.264 (0.032) | <0.001 |
| Hyperlipidemia | -0.107 (0.023) | <0.001 |
| Hypoglycemia | -0.055 (0.026) | 0.03 |
| Hypotension | -0.126 (0.030) | <0.001 |
| Intracranial bleeding | -0.137 (0.068) | 0.04 |
| Ischemic stroke | -0.068 (0.032) | 0.04 |
| Late effects of cerebrovascular disease | -0.196 (0.045) | <0.001 |
| Obesity | -0.072 (0.032) | 0.03 |
| Pulmonary embolism | -0.103 (0.067) | 0.13 |
| Peptic ulcer disease | -0.052 (0.045) | 0.25 |
| Shortness of breath | -0.083 (0.025) | <0.001 |
| Smoking | -0.133 (0.027) | <0.001 |
| Type 1 diabetes mellitus | 0.071 (0.039) | 0.07 |
| Type 2 diabetes mellitus | 0.131 (0.029) | <0.001 |
| **Medication Use** | | |
| Angiotensin-converting enzyme (ACE) inhibitors | -0.068 (0.022) | <0.001 |
| Antibiotics | -0.016 (0.021) | 0.45 |
| Antiplatelet agents | 0.062 (0.031) | 0.04 |
| Angiotensin II receptor blockers (ARBs) | 0.083 (0.036) | 0.02 |
| Betablockers | 0.148 (0.023) | <0.001 |
| Calcium channel blockers | 0.104 (0.029) | <0.001 |
| Insulin | 0.064 (0.042) | 0.13 |
| Loop diuretics | 0.321 (0.024) | <0.001 |
| Non-insulin antidiabetic medications | -0.190 (0.031) | <0.001 |
| Non-steroidal anti-inflammatory drugs (NSAIDs) | -0.094 (0.036) | 0.01 |
| Opioids | -0.052 (0.029) | 0.07 |
| Spironolactone | -0.205 (0.048) | <0.001 |
| Warfarin | -0.014 (0.033) | 0.68 |
| **Healthcare Utilization** | | |
| Number of inpatient days: ≥1 | -0.132 (0.032) | <0.001 |
| Number of emergency department visits: ≥1 | -0.040 (0.030) | 0.18 |
| Number of office visits: ≥10 | 0.0450 (0.037) | 0.19 |
| Number of office visits: 6-9 | -0.055 (0.036) | 0.12 |
| Number of office visits: 3-5 | -0.010 (0.036) | 0.78 |
| Skilled nursing facility days: ≥1 | -0.107 (0.031) | <0.001 |

eGFR: estimated glomerular filtration rate.

# **Table S6.** Hosmer-Lemeshow Goodness of Fit Tables, Using the Primary Model to Predict eGFR Cut-off <30.

| Deciles by Predicted eGFR | eGFR Score <30 in Training Set | | | eGFR Score <30 in Validation Set | | |
| --- | --- | --- | --- | --- | --- | --- |
| N. of Patients | Observed N. Events | Expected N. Events | N. of Patients | Observed N. Events | Expected N. Events |
| 1 | 11,749 | 6 | 16.14 | 5,668 | 2 | 67.94 |
| 2 | 11,743 | 5 | 25.01 | 5,662 | 4 | 68.37 |
| 3 | 11,750 | 15 | 32.42 | 5,680 | 5 | 69.00 |
| 4 | 11,751 | 17 | 40.86 | 5,698 | 5 | 69.68 |
| 5 | 11,750 | 30 | 51.78 | 5,676 | 12 | 70.01 |
| 6 | 11,746 | 39 | 67.18 | 5,680 | 21 | 70.91 |
| 7 | 11,748 | 84 | 91.38 | 5,679 | 24 | 72.27 |
| 8 | 11,749 | 140 | 139.44 | 5,677 | 53 | 75.15 |
| 9 | 11,748 | 489 | 354.97 | 5,675 | 228 | 91.51 |
| 10 | 11,742 | 2,448 | 2,453.86 | 5649 | 1,101 | 800.30 |

The model was developed to predict continuous eGFR. eGFR: estimated glomerular filtration rate.

# **Table S7.** Hosmer-Lemeshow Goodness of Fit Tables, Using the Secondary Model to Predict eGFR Cut-Off <30.

| Deciles by Predicted eGFR | eGFR Score <30 in Training Set | | | eGFR Score <30 in Validation Set | | |
| --- | --- | --- | --- | --- | --- | --- |
| N. of Patients | Observed N. Events | Expected N. Events | N. of Patients | Observed N. Events | Expected N. Events |
| 1 | 11,744 | 4 | 18.68 | 5,678 | 3 | 8.64 |
| 2 | 11,743 | 4 | 27.22 | 5,675 | 6 | 12.77 |
| 3 | 11,758 | 12 | 34.46 | 5,678 | 5 | 15.96 |
| 4 | 11,750 | 16 | 43.94 | 5,672 | 6 | 20.15 |
| 5 | 11,743 | 25 | 57.44 | 5,675 | 17 | 25.86 |
| 6 | 11,746 | 53 | 79.47 | 5,674 | 19 | 34.69 |
| 7 | 11,748 | 89 | 116.57 | 5,675 | 19 | 49.47 |
| 8 | 11,748 | 173 | 186.30 | 5,675 | 60 | 79.47 |
| 9 | 11,748 | 519 | 388.24 | 5,674 | 272 | 176.90 |
| 10 | 11,748 | 2,378 | 2,320.64 | 5,668 | 1,048 | 1,031.09 |

The model was developed to predict the binary outcome of eGFR<30. eGFR: estimated glomerular filtration rate.
